# Supplementary material
Source: HighWire-hosted journal article supplement (https://bmjopen.bmj.com/content/12/11/e065778)
Supplement: inline-supplementary-material-2 [file inline-supplementary-material-2.pdf]

**APPENDIX 2. FINAL CODEBOOK**

*Appendix 2: Final codebook with domains, sub-domains and definitions (in Dutch).*

| <i>Domain</i>           | <i>Sub-domain</i>   | <i>Code Atlas.ti</i>                                                                  | <i>Definition</i>                                                                                                                       |
|-------------------------|---------------------|---------------------------------------------------------------------------------------|-----------------------------------------------------------------------------------------------------------------------------------------|
| <b>1. Inner setting</b> | <i>1.1 Afdeling</i> | 1.1.1 + Draagvlak voor PDCP                                                           | Alles wat er gezegd wordt over de aanwezigheid van draagvlak op afdelingen (werknemers op afdeling zijn enthousiast over PDCP)          |
|                         |                     | 1.1.2 - Draagvlak voor PDCP                                                           | Alles wat er gezegd wordt over afwezigheid van draagvlak op afdelingen (werknemers op afdeling zijn niet enthousiast over PDCP)         |
|                         |                     | 1.1.3 + Teamsamenwerking afdeling                                                     | Alles wat gezegd wordt over factoren die een positieve invloed hebben op samenwerking binnen Amsterdam UMC                              |
|                         |                     | 1.1.4 - Inspanning door afdeling                                                      | Alles wat gezegd wordt over de inspanning die een afdeling levert met negatief effect                                                   |
|                         |                     | 1.1.5 + Inspanning door afdeling                                                      | Alles wat gezegd wordt over de inspanning die een afdeling levert                                                                       |
|                         |                     | 1.1.7 + Kijk tegen verandering                                                        | Alles wat wordt gezegd over veranderingen binnen een afdeling met een bevorderende effect                                               |
|                         |                     | 1.1.8 - Kijk tegen verandering                                                        | Alles wat wordt gezegd over veranderingen binnen een afdeling met een belemmerend effect                                                |
|                         |                     | 1.1.9 - Medewerkers moeilijk te bereiken                                              | Alles wat wordt gezegd over de bereikbaarheid van medewerkers                                                                           |
|                         |                     | 1.1.10 - Resultaat van fuseren op samenwerking                                        | Alles wat gezegd wordt over de nadelige invloed van de fusie op samenwerking binnen een team / afdeling                                 |
|                         |                     | 1.1.11 - Verandering moe                                                              | Alles wat gezegd wordt over veranderingen wat aanduidt dat medewerkers klaar zijn met de veranderingen                                  |
|                         |                     | 1.1.12 - Onbekendheid van medewerkers over zorgproces en informatie binnen aandoening | Alles wat gezegd wordt over de onbekendheid die medewerkers ervaren over wat er binnen een aandoening precies gebeurt in het zorgproces |

|                                     |                                                                  |                                                                                                                                                                                                        |
|-------------------------------------|------------------------------------------------------------------|--------------------------------------------------------------------------------------------------------------------------------------------------------------------------------------------------------|
| 1.2<br><i>Ziekenhuis-<br/>breed</i> | 1.2.1 - Amsterdam UMC loopt<br>achter qua innovatie              | Alles wat gezegd wordt over het<br>innovatieve karakter van Amsterdam<br>UMC t.o.v. andere organisaties en de<br>samenleving                                                                           |
|                                     | 1.2.2 + Capaciteit om te<br>innoveren                            | Alles wat gezegd wordt over het hebben<br>van voldoende capaciteit van afdelingen<br>om te innoveren                                                                                                   |
|                                     | 1.2.3 - Capaciteit om te<br>innoveren                            | Alles wat gezegd wordt over de<br>capaciteit van afdelingen om te<br>innoveren                                                                                                                         |
|                                     | 1.2.4 - Cultuur Amsterdam UMC                                    | Alles wat gezegd wordt over de cultuur<br>van Amsterdam UMC                                                                                                                                            |
|                                     | 1.2.5 - Dingen opleggen werkt<br>niet                            | Alles wat gezegd wordt over dat<br>medewerkers het idee krijgen dat ze iets<br>wordt opgelegd door besturende<br>organen (RvB, managers etc.), waar ze<br>zelf geen mening over hebben kunnen<br>geven |
|                                     | 1.2.6 + Draagvlak nodig voor<br>uitvoering                       | Alles wat gezegd wordt over het<br>draagvlak wat nodig is voor het gebruik<br>van een innovatie                                                                                                        |
|                                     | 1.2.7 - Draagvlak nodig voor<br>uitvoering                       | Alles wat gezegd wordt over het<br>draagvlak wat nodig is voor het gebruik<br>van een innovatie                                                                                                        |
|                                     | 1.2.8 + Eerdere ervaringen met<br>innovaties beïnvloeden adoptie | Alles wat gezegd wordt over eerdere<br>ervaringen met soortgelijke innovaties,<br>wat adoptie van innovatie positief kan<br>beïnvloeden                                                                |
|                                     | 1.2.9 - Eerdere ervaringen met<br>innovaties beïnvloeden adoptie | Alles wat gezegd wordt over eerdere<br>ervaringen met soortgelijke innovaties,<br>wat adoptie van innovatie negatief kan<br>beïnvloeden                                                                |
|                                     | 1.2.10 + Financieren innovaties                                  | Alles wat er gezegd wordt over het<br>financieren van innovaties en de invloed<br>hiervan op adoptie                                                                                                   |
|                                     | 1.2.11 - Financieren innovaties                                  | Alles wat er gezegd wordt over het<br>financieren van innovaties en de invloed<br>hiervan op adoptie                                                                                                   |
|                                     | 1.2.12 - Fuseren twee huizen                                     | Alles wat gezegd wordt over het fuseren<br>van het VUmc en AMC (op<br>organisatieniveau)                                                                                                               |

|                         |                                                |                                                                                                                                                |
|-------------------------|------------------------------------------------|------------------------------------------------------------------------------------------------------------------------------------------------|
|                         | 1.2.13 + Helderheid in verdeling van rollen    | Alles wat er gezegd wordt over dat het voor stakeholders duidelijk is wat de rolverdeling is                                                   |
|                         | 1.2.14 - Helderheid in verdeling van rollen    | Alles wat er gezegd wordt over dat het voor stakeholders duidelijk is wat de rolverdeling is                                                   |
|                         | 1.2.15 + Informatie voorziening voor patiënten | Alles wat wordt gezegd over de informatie dat wordt aangeboden aan patiënten                                                                   |
|                         | 1.2.16 - Informatie voorziening voor patiënten | Alles wat wordt gezegd over de informatie dat wordt aangeboden aan patiënten                                                                   |
|                         | 1.2.17 + PDCP past binnen beleid Amsterdam UMC | Alles wat gezegd wordt over het passen van PDCP bij het beleid van Amsterdam UMC                                                               |
|                         | 1.2.18 - PDCP past binnen beleid Amsterdam UMC | Alles wat gezegd wordt over het passen van PDCP bij het beleid van Amsterdam UMC                                                               |
|                         | 1.2.19 - Onbekendheid ziekenhuis breed         | Alles wat er gezegd wordt over de onbekendheid die medewerkers ervaren over processen en beleid keuzes                                         |
|                         | 1.2.20 - Teamsamenwerking ziekenhuis           | Alles wat gezegd wordt over factoren die een negatieve invloed hebben op samenwerking (ook onderlinge communicatie bijv.) binnen Amsterdam UMC |
| <b>2. Outer setting</b> | 2.1 Landelijk uitwisseling                     | Alles wat gezegd wordt over de uitwisseling tussen verschillende ziekenhuizen (van patiënt informatie, van informatie, filmpjes etc.)          |
|                         | 2.2 Landelijke druk eHealth                    | Alles wat gezegd wordt over de druk die de overheid uitoefent op het innoveren in eHealth                                                      |
|                         | 2.3 Leverancier                                | Alles wat gezegd worden over samenwerking met een externe leverancier                                                                          |
| <b>3. Intervention</b>  | 3.1 <i>Geen meerwaarde PDCP zorgverlener</i>   | 3.1 - Geen meerwaarde PDCP zorgverlener                                                                                                        |
|                         | 3.1 <i>Geen meerwaarde PDCP zorgverlener</i>   | Alles wat gezegd wordt over de meerwaarde van PDCP voor zorgverleners(groepen)                                                                 |

|                                     |                                                  |                                                                                                                                                       |
|-------------------------------------|--------------------------------------------------|-------------------------------------------------------------------------------------------------------------------------------------------------------|
| 3.2<br><i>Meerwaarde PDCP</i>       | 3.2.1 + Goede informatievoorziening voor patiënt | Alles wat gezegd wordt over de toegankelijke en betrouwbare infovoorziening (voor patiënt) met kwaliteit en de juiste hoeveelheid, door PDCP verzorgt |
|                                     | 3.2.2 + Maatwerk voor patiënt                    | Alles wat gezegd wordt over de mogelijkheid die PDCP biedt om maatwerk te leveren aan de patiënt                                                      |
|                                     | 3.2.3 + Meerwaarde zorgverlener                  | Alles wat gezegd wordt over de meerwaarde van PDCP voor zorgverleners(groepen)                                                                        |
|                                     | 3.2.4 + PDCP draagt bij aan andere doelen        | Alles wat gezegd wordt over andere doelen die bereikt kunnen worden door PDCP (SDM, koppeling PROMs, meer grip zorgtraject voor patiënten)            |
|                                     | 3.2.5 + Tijdsparing / efficiënter werken         | Alles wat gezegd wordt over dat PDCP efficiëntie stimuleert                                                                                           |
|                                     | 3.2.6 + PDCP past in huidige werkwijze           | Alles wat gezegd wordt over de passendheid van PDCP in de huidige werkwijze                                                                           |
|                                     | 3.2.7 - PDCP past in huidige werkwijze           | Alles wat gezegd wordt over de passendheid van PDCP in de huidige werkwijze                                                                           |
|                                     | 3.2.8 - Patiënt- arts relatie                    | Alles wat gezegd wordt over de invloed van PDCP op de arts-patiënt relatie                                                                            |
| 3.3 <i>Gebruiks-vriendelijkheid</i> | 3.3.1 + Aansluiten behoeftes patiënt             | Alles wat gezegd wordt over de behoefte van de patiënt aan PDCP                                                                                       |
|                                     | 3.3.2 - Aansluiten behoeftes patiënt             | Alles wat gezegd wordt over de behoefte van de patiënt aan PDCP                                                                                       |
|                                     | 3.3.3 + Aansluiten informatiebehoefte patiënt    | Alles wat gezegd wordt over de informatiebehoefte van de patiënt                                                                                      |
|                                     | 3.3.4 - Geschiktheid voor iedereen               | Alles wat gezegd wordt over de geschiktheid van PDCP bij ieder type patiënt (zoals laaggeletterden, andere talen)                                     |
| 3.4 <i>Beheer</i>                   | 3.4.1 - Beheer PDCP                              | Alles wat gezegd wordt over het beheer van PDCP                                                                                                       |
|                                     | 3.4.2 + Koppeling met Epic                       | Alles wat gezegd wordt over de koppeling tussen EPIC en PDCP                                                                                          |

|                       |                                           |                                                                                                                          |
|-----------------------|-------------------------------------------|--------------------------------------------------------------------------------------------------------------------------|
|                       | 3.4.3 - Koppeling met Epic                | Alles wat gezegd wordt over de koppeling tussen EPIC en PDCP                                                             |
|                       | 3.4.4 + Kosten                            | Alles wat gezegd wordt over de kosten van PDCP                                                                           |
|                       | 3.4.5 - Kosten                            | Alles wat gezegd wordt over de kosten van PDCP                                                                           |
|                       | 3.4.6 - Meerdere apps nodig               | Alles wat gezegd wordt over dat er meerdere apps nodig zijn voor patiënten om meer te weten over hun zorg en zorgtraject |
|                       | 3.4.7 + Gebruik van PDCP                  | Alles wat er gezegd wordt over hoe PDCP te gebruiken is                                                                  |
|                       | 3.4.8 - Gebruik van PDCP                  | Alles wat er gezegd wordt over hoe PDCP te gebruiken is                                                                  |
|                       | 3.4.9 + Uiterlijk PDCP                    | Alles wat gezegd wordt over de ervaring van hoe PDCP eruit ziet                                                          |
| 3.5 <i>Risico's</i>   | 3.5.1 + Effect en risico                  | Alles wat gezegd wordt over risico's van informatie digitaliseren (wat invloed kan hebben op de implementatie van PDCP)  |
|                       | 3.5.2 – Effect en risico                  | Alles wat gezegd wordt over risico's van informatie digitaliseren (wat invloed kan hebben op de implementatie van PDCP)  |
| <b>4. Individuals</b> | 4.1 + Attitude eindgebruikers t.o.v. PDCP | Alles wat gezegd wordt over hoe eindgebruikers tegenover PDCP staan                                                      |
|                       | 4.2 - Attitude eindgebruikers t.o.v. PDCP | Alles wat gezegd wordt over hoe eindgebruikers tegenover PDCP staan                                                      |
|                       | 4.3 + Betrokkenheid van eindgebruikers    | Alles wat gezegd wordt over de invloed van de betrokkenheid van eindgebruikers op de implementatie                       |
|                       | 4.4 - Betrokkenheid van eindgebruikers    | Alles wat gezegd wordt over de invloed van de betrokkenheid van eindgebruikers op de implementatie                       |
|                       | 4.5 + Karakteristieken eindgebruikers     | Alles wat gezegd wordt over de eigenschappen van eindgebruikers, zoals leeftijd, skills met omgaan eHealth               |
|                       | 4.6 - Karakteristieken eindgebruikers     | Alles wat gezegd wordt over de eigenschappen van eindgebruikers, zoals leeftijd, skills met omgaan eHealth               |

|                   |                                  |                                                           |                                                                                                                                    |
|-------------------|----------------------------------|-----------------------------------------------------------|------------------------------------------------------------------------------------------------------------------------------------|
|                   |                                  | 4.7 + Ervaringen delen motiveert                          | Alles wat gezegd wordt over ervaringen delen (van eindgebruikers) met de ondersteunende diensten, wat als motiverend wordt ervaren |
|                   |                                  | 4.8 + Motivatie om te veranderen                          | Alles wat gezegd wordt over de motivatie van medewerkers om hun dagelijkse werkzaamheden te veranderen                             |
|                   |                                  | 4.9 - Motivatie om te veranderen                          | Alles wat gezegd wordt over de motivatie van medewerkers om hun dagelijkse werkzaamheden te veranderen                             |
|                   |                                  | 4.10 + Herinnering voor PDCP nodig                        | Alles wat gezegd wordt over het herinneren van eindgebruikers aan PDCP                                                             |
|                   |                                  | 4.11 - Herinnering voor PDCP nodig                        | Alles wat gezegd wordt over het herinneren van eindgebruikers aan PDCP                                                             |
| <b>5. Process</b> | <b>5.1</b><br><i>Bevorderend</i> | 5.1.1 + Randvoorwaarden gebruik                           | Alles wat gezegd wordt over wat nodig is voor eindgebruikers om PDCP (praktisch) te gebruiken in dagelijkse werkzaamheden          |
|                   |                                  | 5.1.2 + Suggesties voor implementatie en gebruik          | Suggesties hoe de implementatie en gebruik het best vormgegeven kan worden                                                         |
|                   |                                  | 5.1.3 + Suggesties voor verbetering inhoud / ontwikkeling | Suggesties hoe verbeteringen het best aangepakt kunnen worden (feedbackloops)                                                      |
|                   |                                  | 5.1.4 + Sense of urgency nodig voor succes                | Alles wat gezegd wordt over het gevoel van urgentie, wat een organisatie nodig heeft om een innovatie te laten slagen              |
|                   | <b>5.2</b><br><i>Belemmerend</i> | 5.2.1 - Onduidelijkheid rondom proces PDCP                | Alles wat gezegd wordt over onduidelijkheid rondom gebruikers proces van PDCP                                                      |
|                   |                                  | 5.2.2 - Randvoorwaarden gebruik                           | Alles wat gezegd wordt over wat nodig is voor eindgebruikers om PDCP te gebruiken in dagelijkse werkzaamheden                      |
|                   |                                  | 5.2.3 - Selectie maken is moeilijk                        | Alles wat wordt gezegd over de selectie welke afdelingen mee mogen doen met gebruik PDCP                                           |
|                   |                                  | 5.2.4 - Uitvoering moeizaam                               | Alles wat gezegd wordt over hoe de uitvoering van PDCP gaat                                                                        |

---

|                                |                                                                                               |
|--------------------------------|-----------------------------------------------------------------------------------------------|
| 5.2.5 - Verschil in definities | Alles wat gezegd wordt over definities en termen rondom het proces van implementeren van PDCP |
|--------------------------------|-----------------------------------------------------------------------------------------------|

---
